# Supplementary material for: A systematic review and meta-analysis of acceptance- and mindfulness-based interventions for DSM-5 anxiety disorders
Source: PubMed Central journal article supplement (PMC8516851; doi:10.1038/s41598-021-99882-w), 2021-10-14
Supplement: 41598_2021_99882_MOESM1_ESM.pdf [file 41598_2021_99882_MOESM1_ESM.pdf]

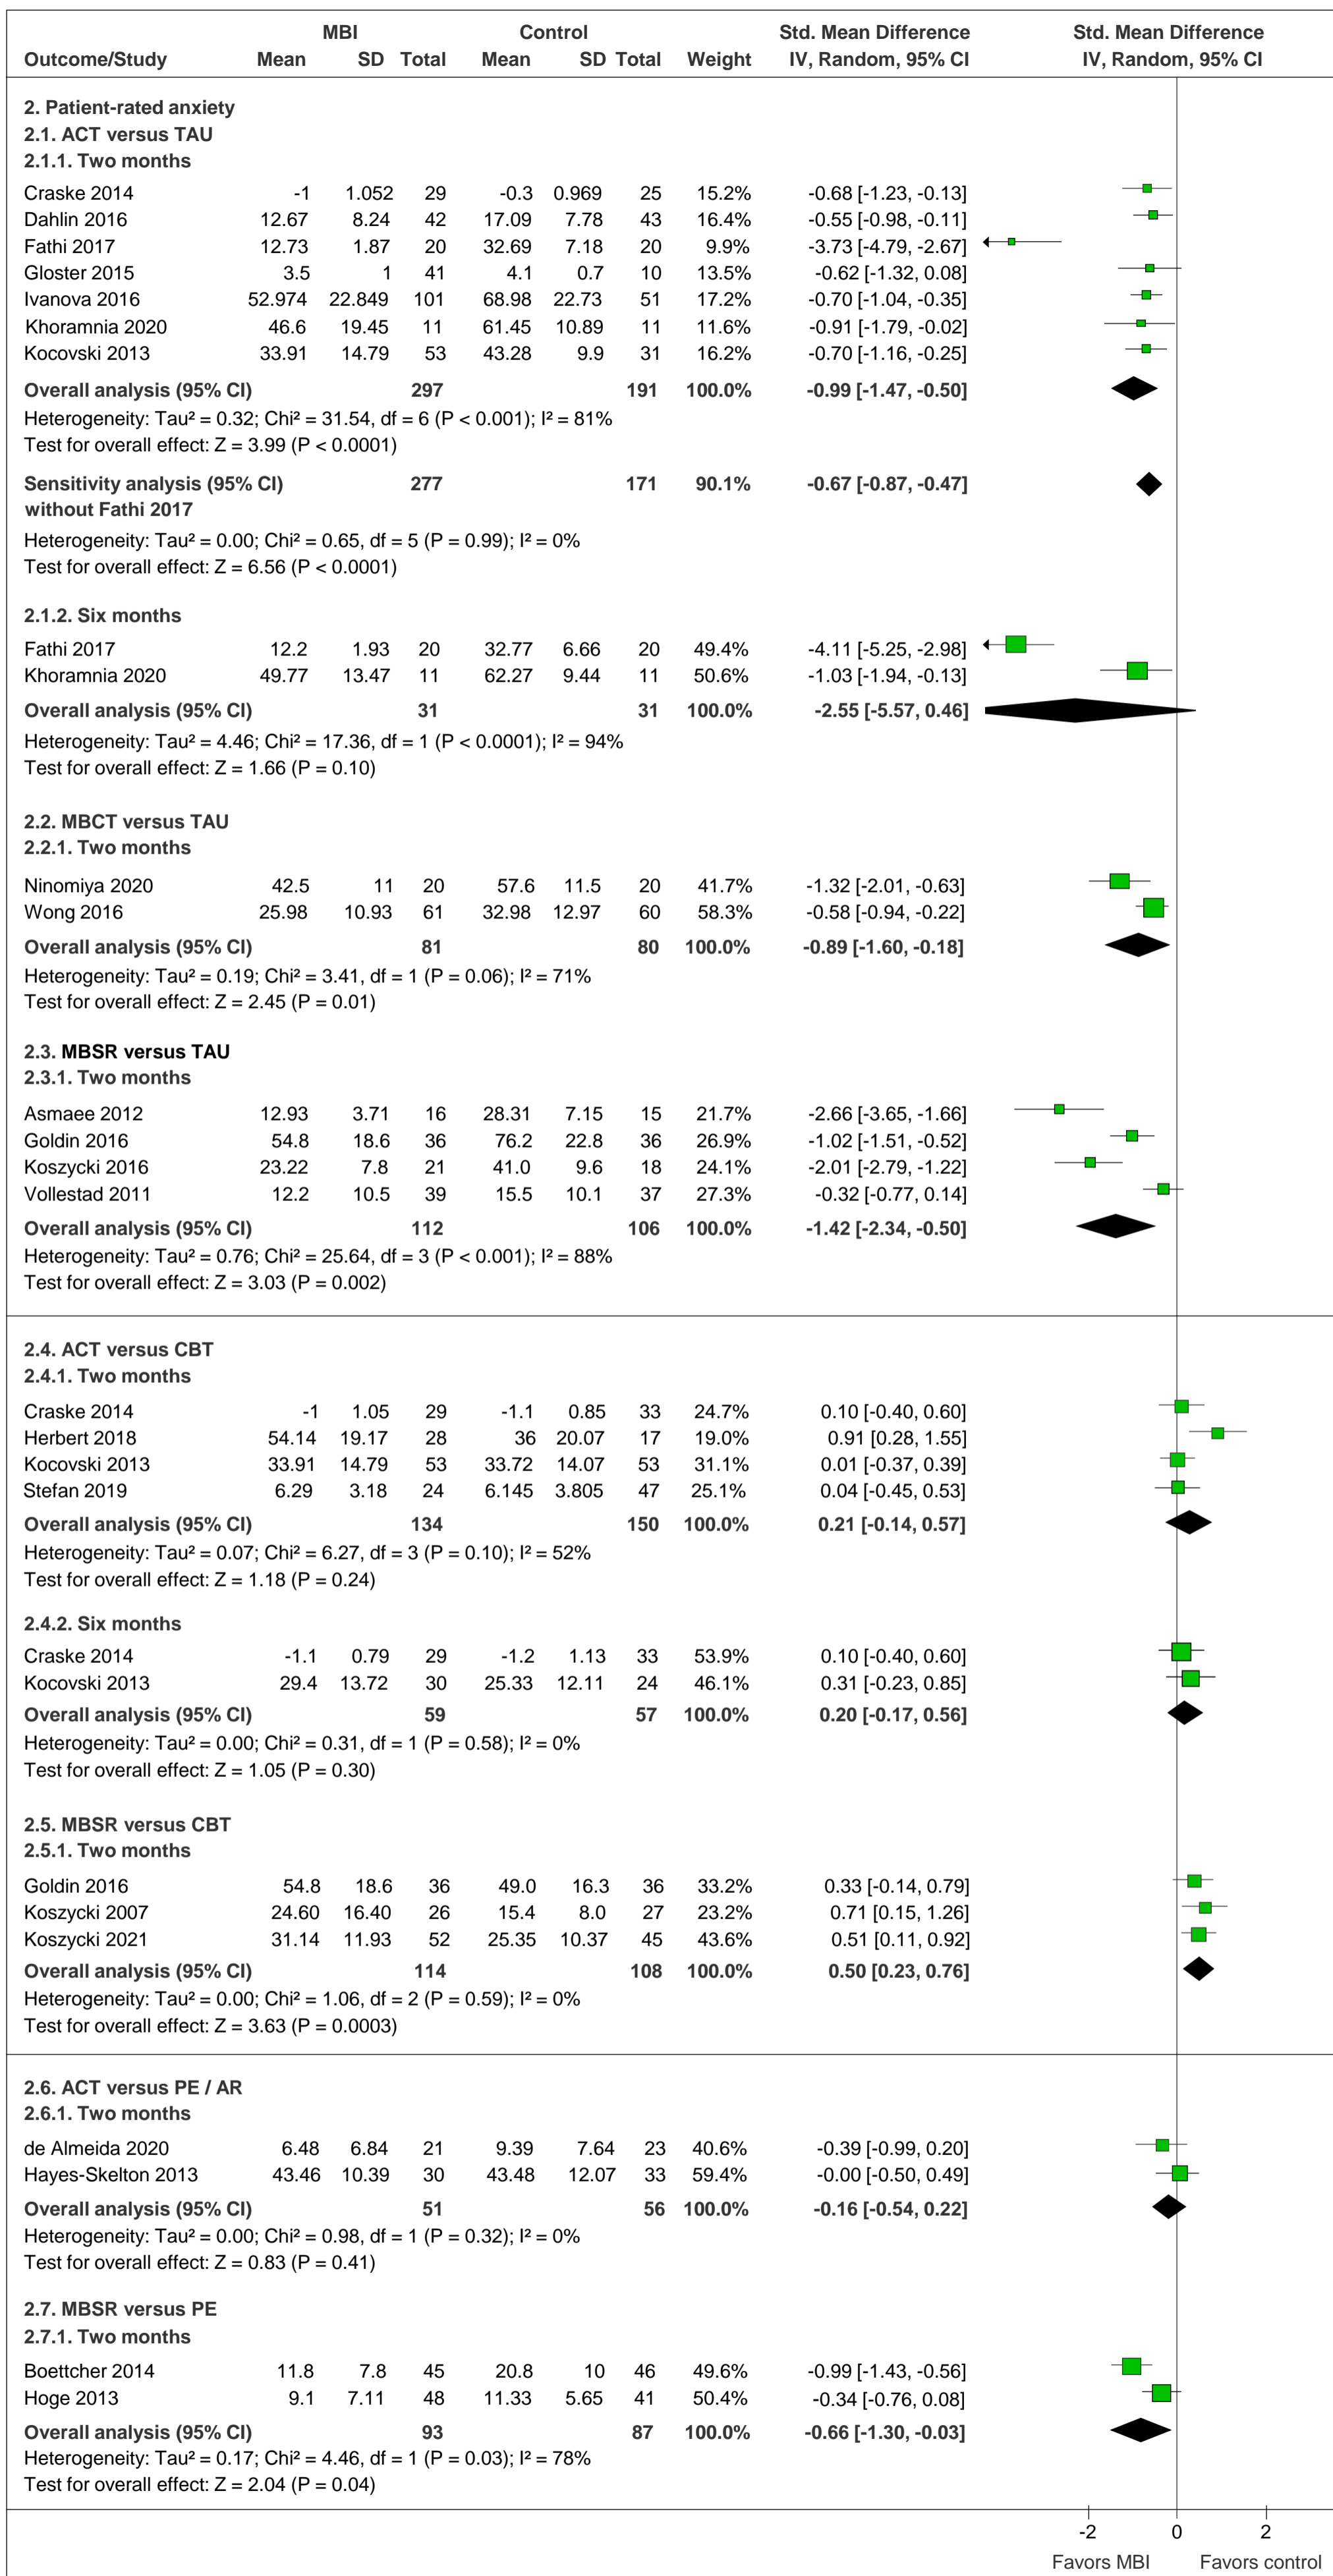

**Supplementary Fig. 2** Forest plot of the effects on patient-rated anxiety. Legend. ACT: Acceptance and Commitment Therapy; AR: Applied relaxation; CBT: Cognitive Behavioral Therapy; CI: Confidence interval; I<sup>2</sup>: Measure of statistical heterogeneity; IV: Inverse variance; MBCT: Mindfulness-based Cognitive Therapy; MBSR: Mindfulness-based stress reduction; PE: Psychoeducation; TAU: Treatment as usual

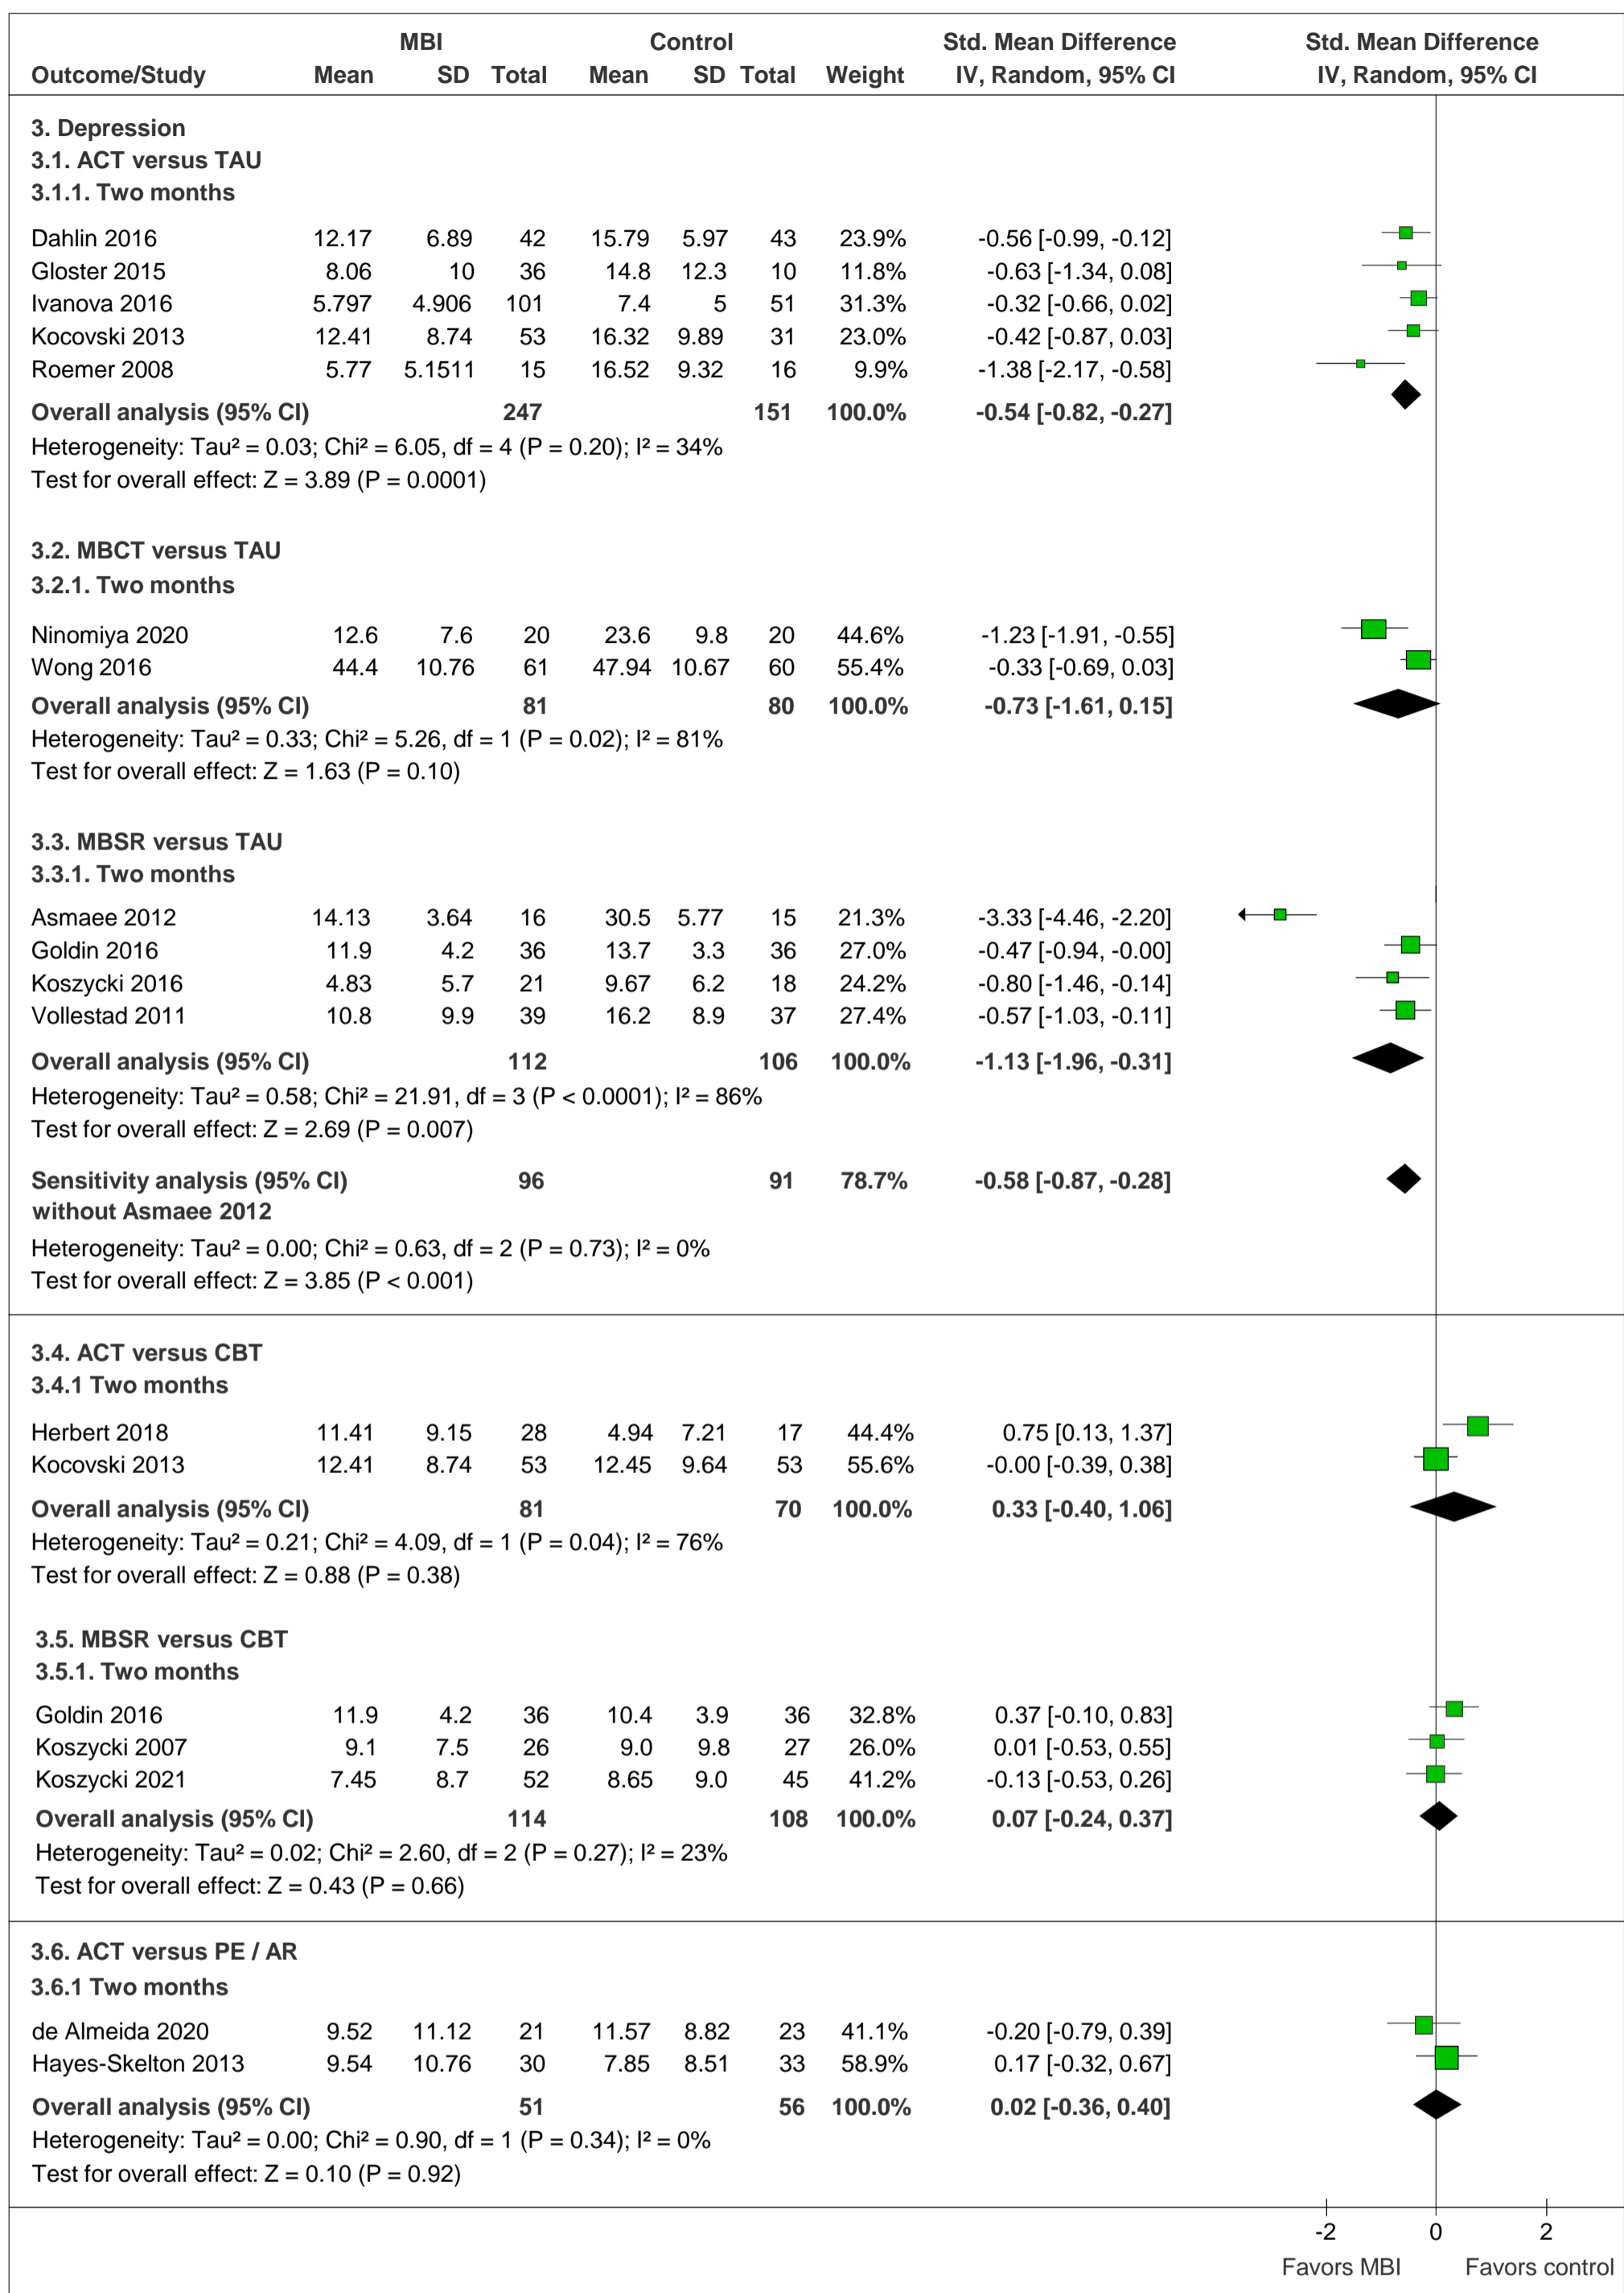

**Supplementary Fig. 3** Forest plot of the effects on depression. Legend. ACT: Acceptance and Commitment Therapy; AR: Applied relaxation; CBT: Cognitive Behavioral Therapy; CI: Confidence interval; I<sup>2</sup>: Measure of statistical heterogeneity; IV: Inverse variance; MBCT: Mindfulness-based Cognitive Therapy; MBSR: Mindfulness-based stress reduction; PE: Psychoeducation; TAU: Treatment as usual

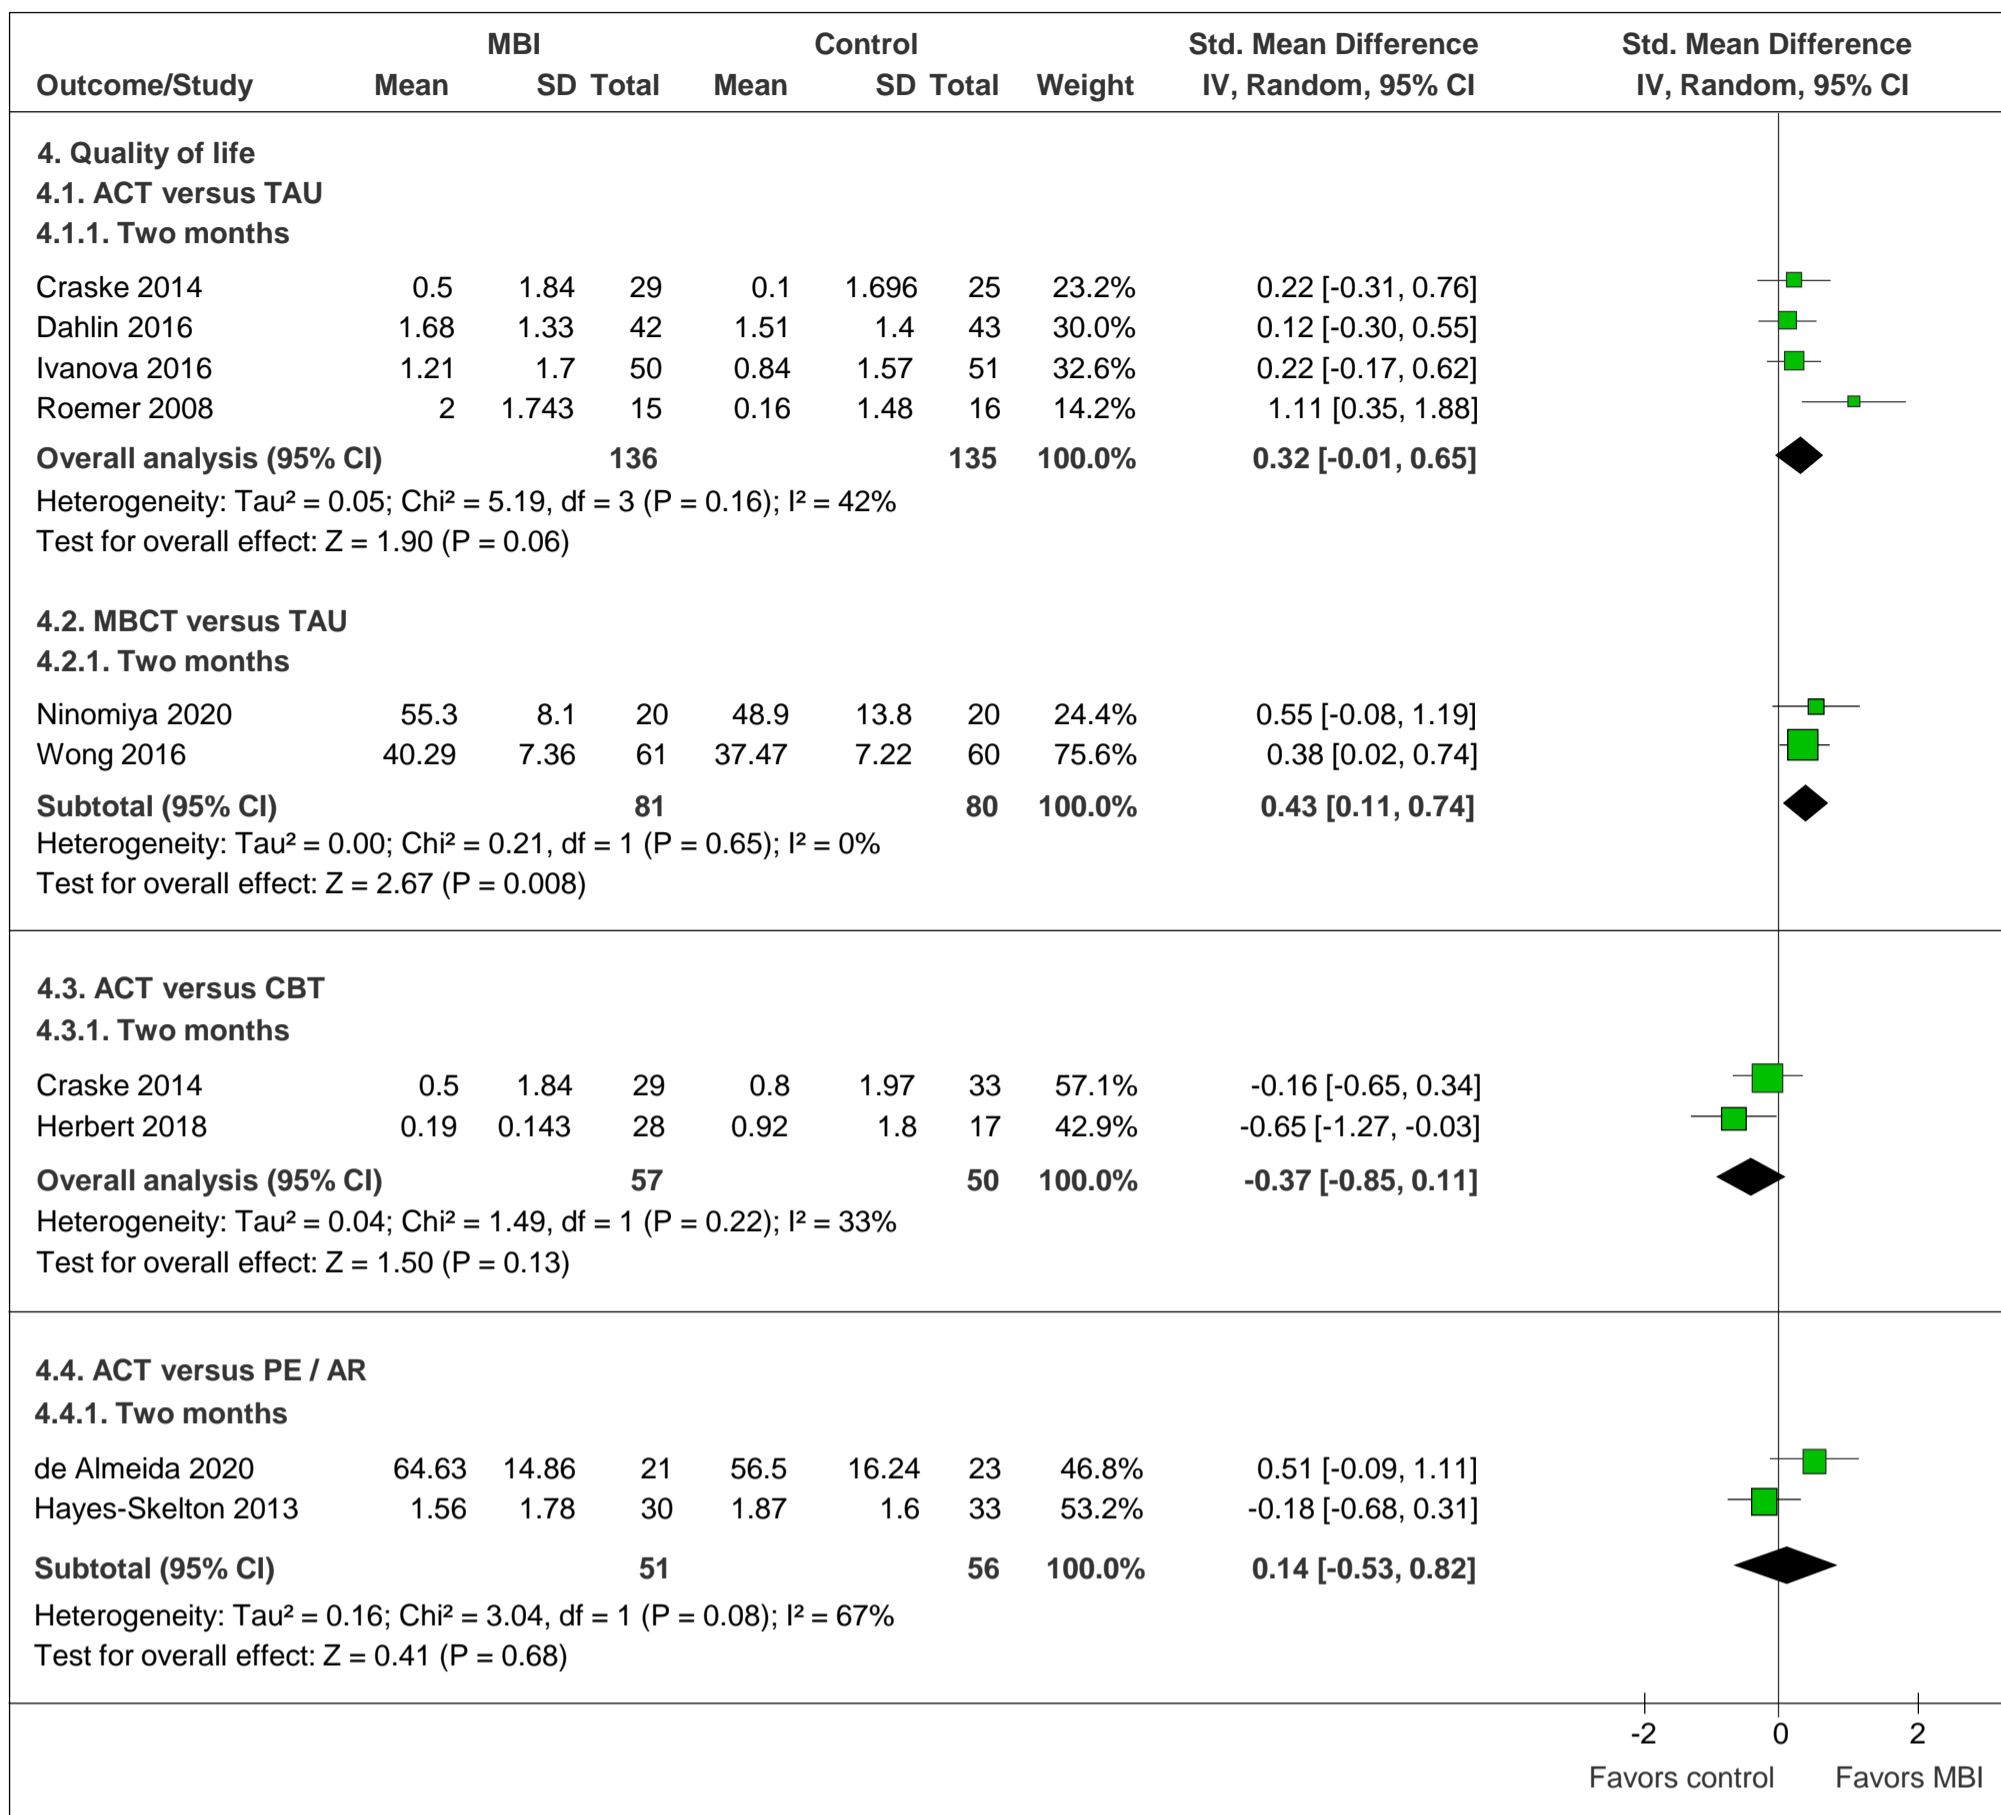

**Supplementary Fig. 4** Forest plot of the effects on quality of life. Legend. ACT: Acceptance and Commitment Therapy; AR: Applied relaxation; CBT: Cognitive Behavioral Therapy; CI: Confidence interval; I<sup>2</sup>: Measure of statistical heterogeneity; IV: Inverse variance; MBCT: Mindfulness-based Cognitive Therapy; PE: Psychoeducation; TAU: Treatment as usual
